# Supplementary material for: The Interaction between Reactive Peritoneal Mesothelial Cells and Tumor Cells via Extracellular Vesicles Facilitates Colorectal Cancer Dissemination
Source: MDPI journal article supplement (doi:10.3390/cancers13102505), 2021-05-20
Supplement: s1 [file s1]

# Supplementary Material: The interaction between reactive peritoneal mesothelial cells and tumor cells via extracellular vesicles facilitates colorectal cancer dissemination

Simona Serrati, Letizia Porcelli, Francesco Fragassi, Marianna Garofoli, Roberta Di Fonte, Livia Fucci, Rosa Maria Iacobazzi, Antonio Palazzo, Francesca Margheri, Grazia Cristiani, Anna Albano, Raffaele De Luca, Donato Francesco Altomare, Michele Simone and Amalia Azzariti

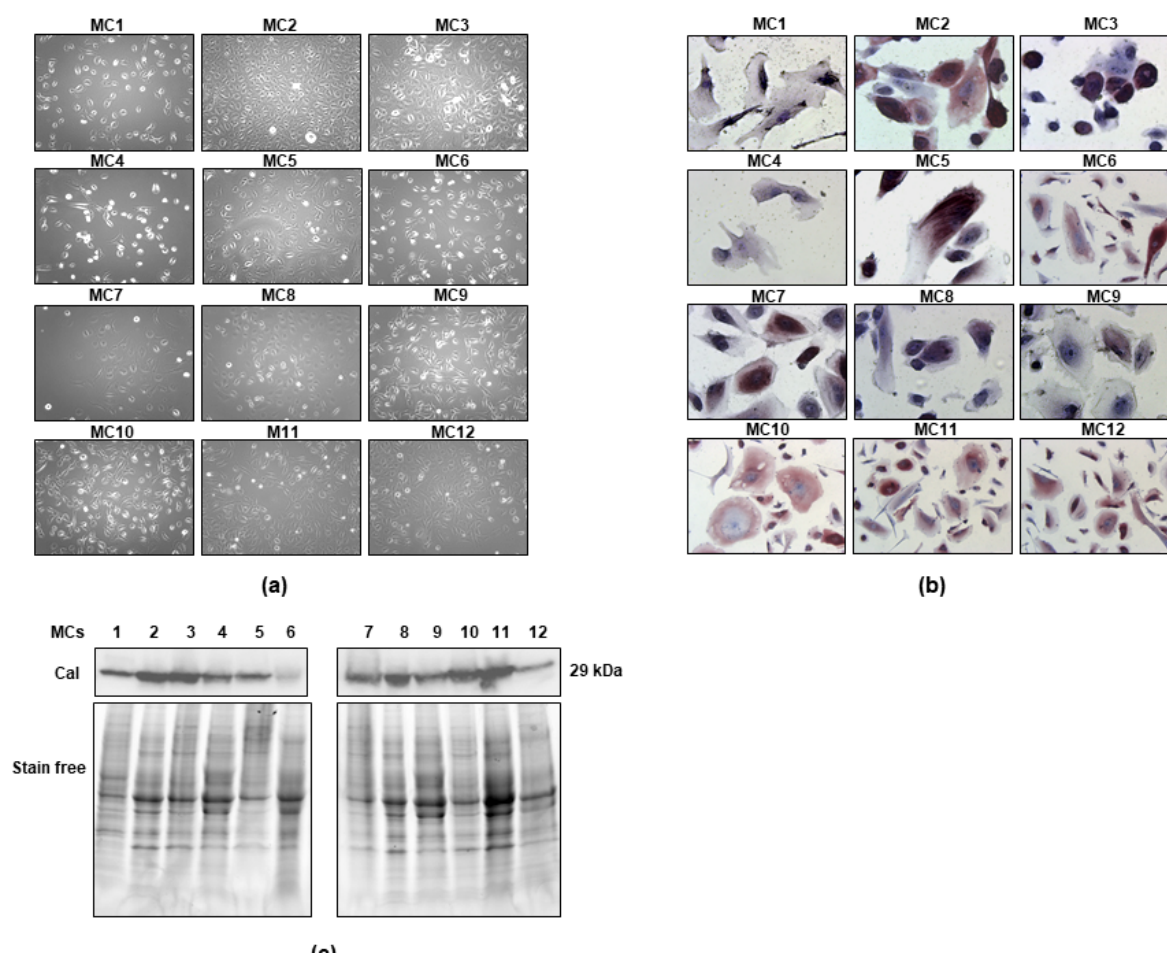

**Figure S1.** Characterization of the peritoneal mesothelial cell lines. **a)** Images of optical microscopy showing the morphology of the 12 MC cell lines isolated from the PLF of 12 colorectal cancer patients. **b)** Images showing the immunostaining of fixed MC cell lines with the anti-calretinin (Cal) antibody (red color) showing variable expression of the biomarker among the 12 cell lines. Counterstain of nuclei was done with Hematoxylin. (magnification x100). **c)** Western blot analysis of Cal protein expression in the 12 MC cell lines. Stain free detection is used as loading control.

#

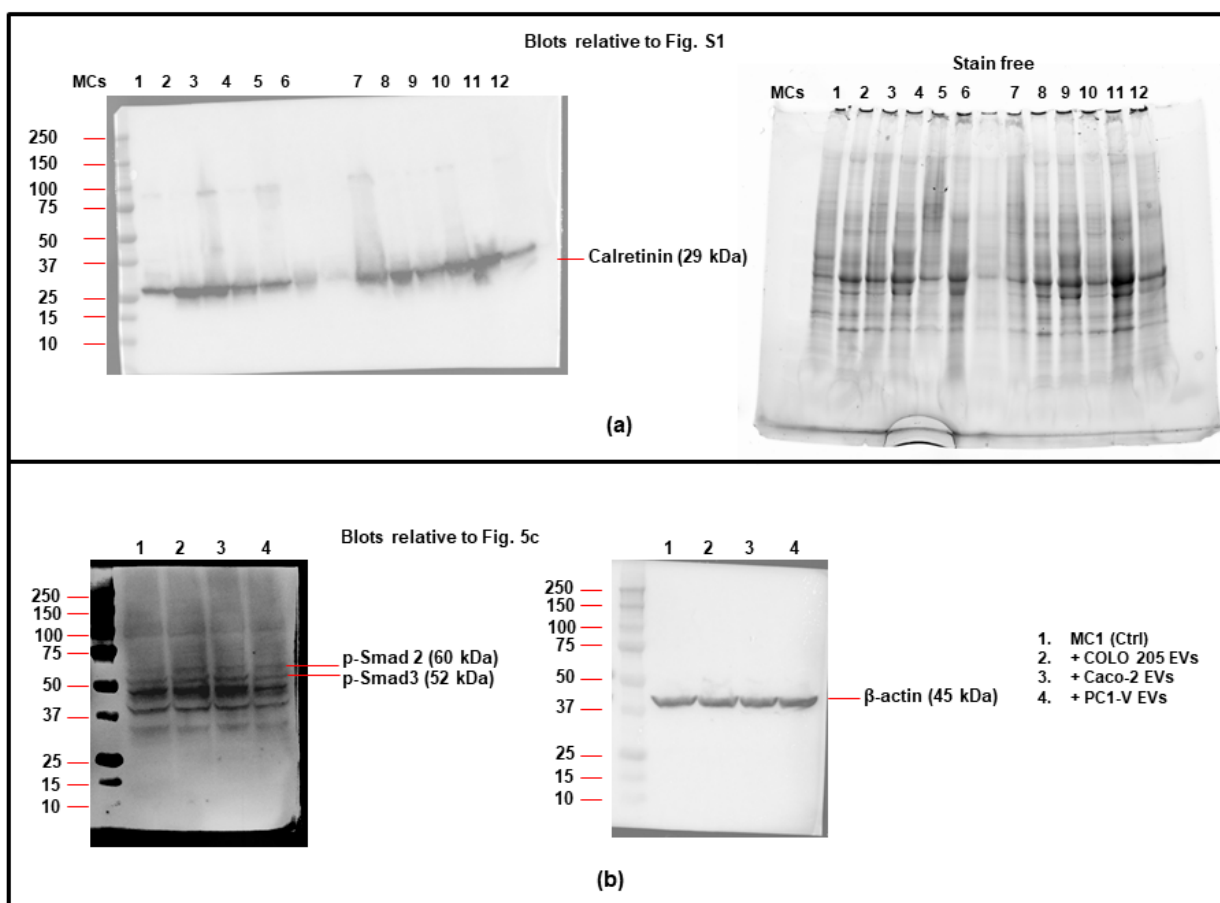

**Figure S2.** Whole blot related to Figure S1 and Figure 5c. Images showing all the bands with all molecular weight markers on the Western Blot for Calretinin expression with relative complete stain-free gel (a), and whole blot for p-SMAD 2/3 expression with relative  $\beta$ -Actin expression.

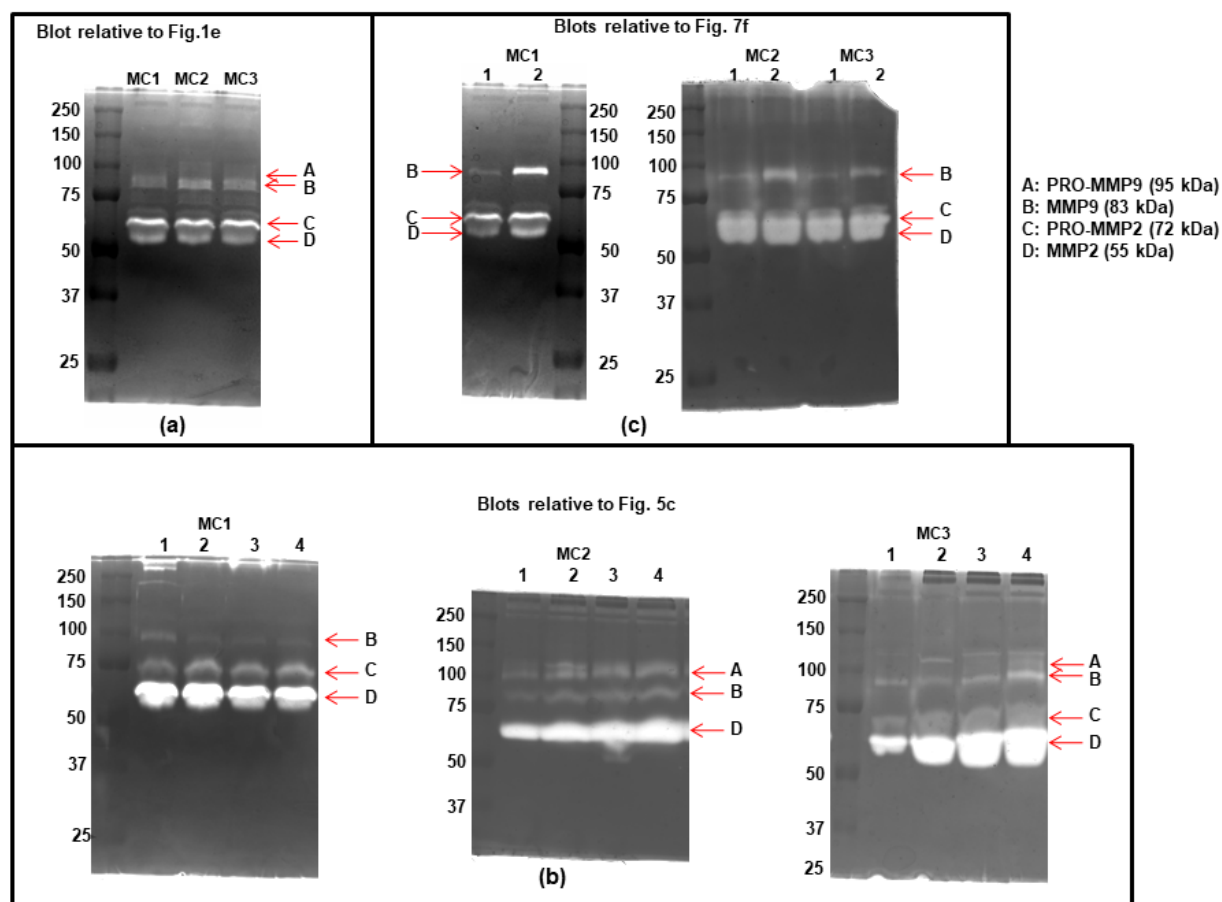

**Figure S3.** Whole gel related to gelatin zymography assay. Images showing molecular weight markers relative to gelatin zymography represented in Figure 1 (a), Figure 5c (b) and Figure 7f (c).

| Cell line | In vitro       |                   |                 | In vivo |     |                            |                                            |           |
|-----------|----------------|-------------------|-----------------|---------|-----|----------------------------|--------------------------------------------|-----------|
|           | Growth pattern | Doubling time (h) | Cell morphology | sex     | age | Original size of cell line | pathology                                  | TNM stage |
| PC1-V     | Adherent       | 34                | Polygonal       | M       | 42  | Ascites                    | Peritoneal carcinosis from colon carcinoma | T4        |

(a)

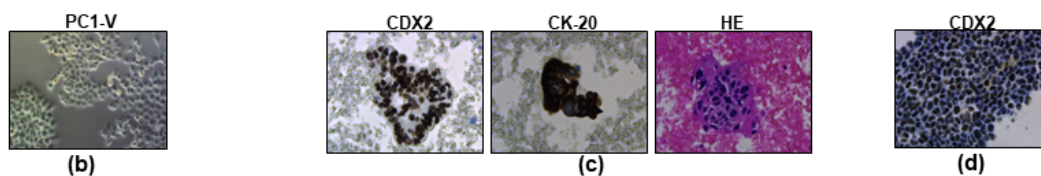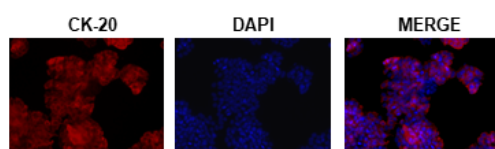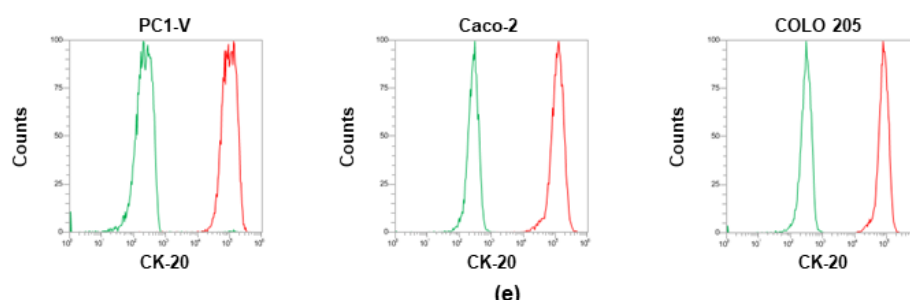

(e)

**Figure S4.** Establishment and characterization of primary cancer cell line PC1-V. **a)** In vitro and in vivo characteristics of PC1-V cells. **b)** Images of optical microscopy showing PC1-V cells displaying an epithelial-like morphology and an adherent growth. **c)** Images showing CDX2 and CK-20 positivity by immunoperoxidase staining and the HE staining of the patient cytological sample. **d)** CDX2 positivity of PC1-V cells by IHC. **e)** Images of fluorescence microscopy showing CK-20 positivity in PC1-V cells determined by IF, and FCM. The latter analysis shows the expression of CK-20 in comparison with COLO 205 and Caco-2 cell lines by FCS.

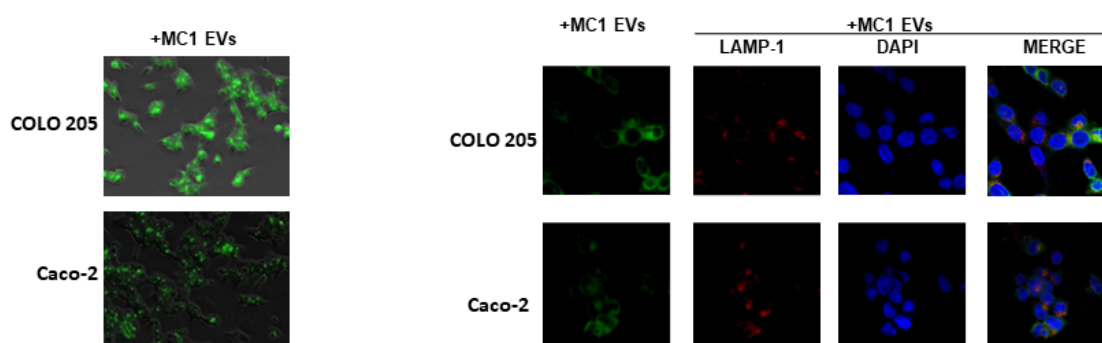

**Figure S5.** PKH67-MC1 EVs are internalized in tumor cells and colocalize with lysosome marker LAMP-1. Representative images of fluorescence and phase-contrast microscopy showing fluorescent PKH67-MC1 EVs (green) in Caco-2 and COLO 205 cell lines (magnification x400) and representative images of fluorescence confocal microscopy showing PKH67-MC1 EVs (green) and LAMP-1 (red) in the same cells.

EVs (green) uptake and colocalization with LAMP-1 (red) in Caco-2 and COLO 205 cell lines. Nuclei are counterstained with Dapi (blue) (magnification x100).

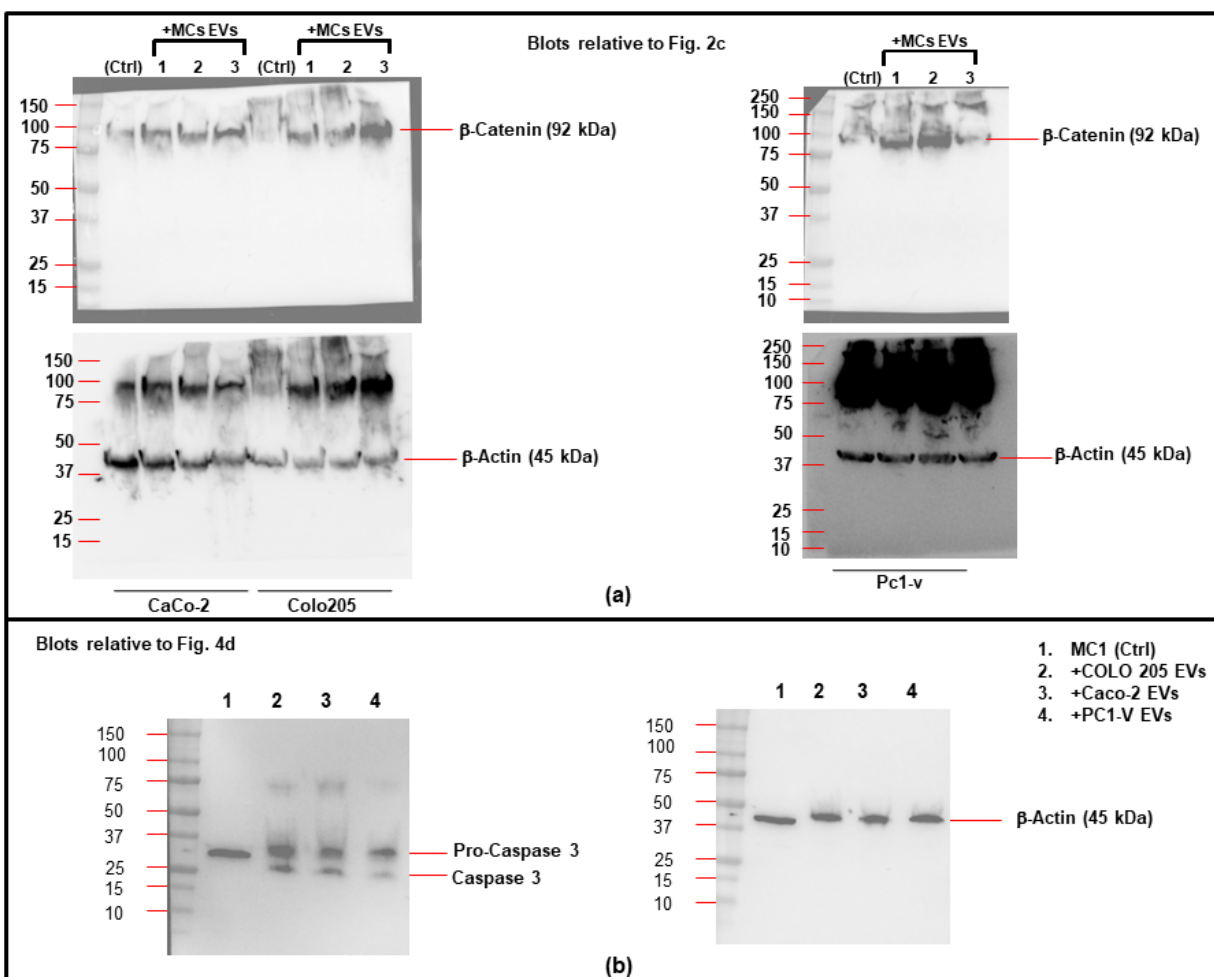

**Figure S6.** Whole blot related to Figure 2c and Figure 4d. Images showing all the bands with all molecular weight markers on the Western Blot for β-Catenin with relative β-Actin expression (a), and whole blot for Caspase-3 expression with relative β-Actin expression (b).

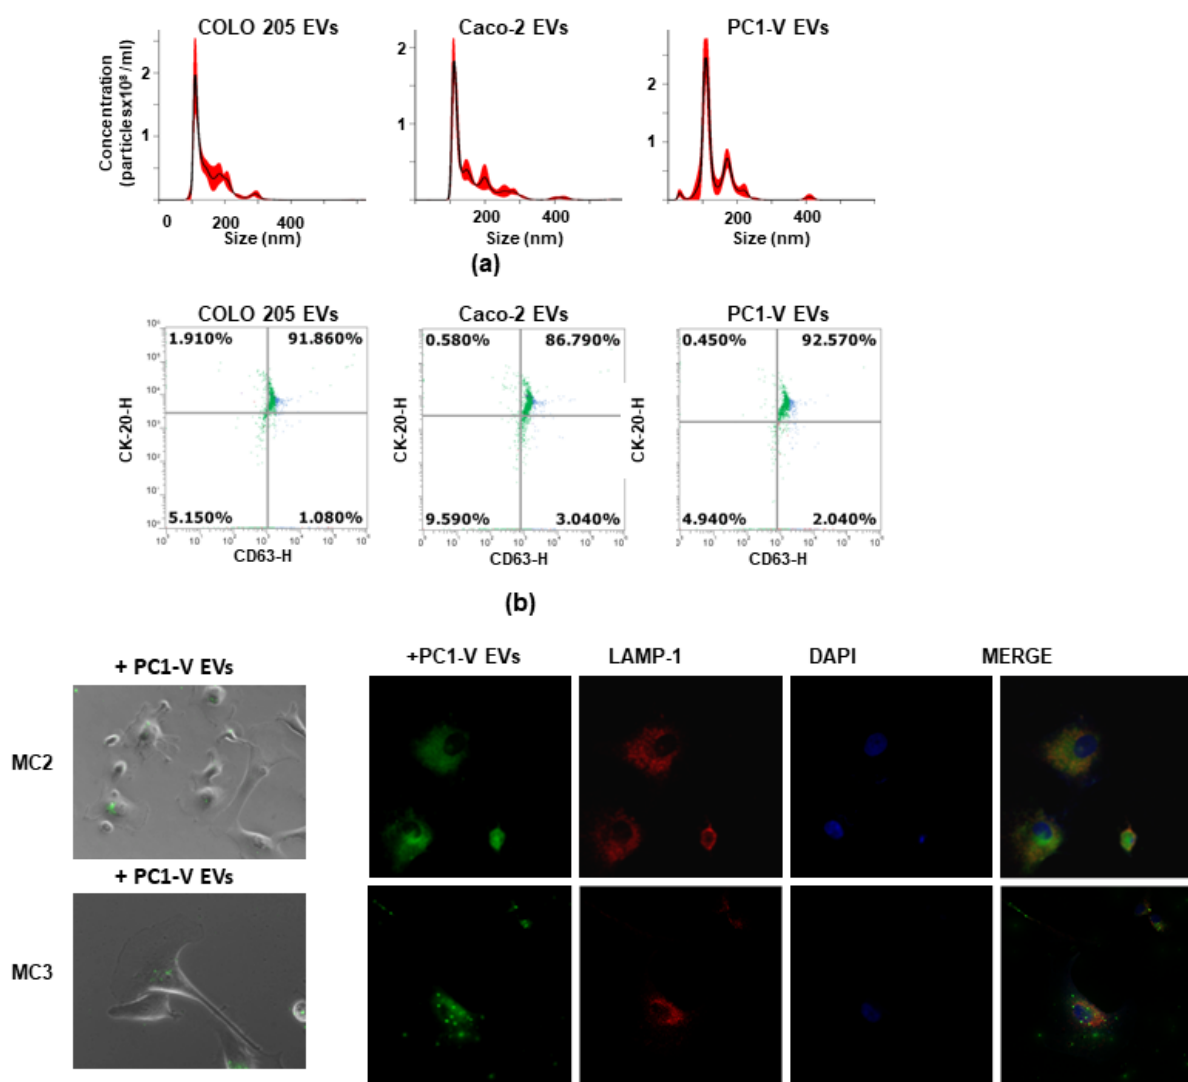

**Figure S7.** Internalization and characterization of tumor-EVs. **a)** Nanoparticle tracking analyses showing the concentration and the size of EVs released by tumor cell lines. **b)** Dot plots corresponding to the FCM analysis of EVs released by tumor cells (CK-20), showing that the majority of them are CD63<sup>+</sup> one. **c)** Representative images of fluorescence and phase-contrast microscopy showing fluorescent PKH67-PC1-V EVs (green) in MC2 and MC3 cell lines (magnification x400) and representative images of fluorescence confocal microscopy showing PKH67-PC1-V EVs (green) uptake and colocalization with LAMP-1 (red) in Caco-2 and COLO 205 cell lines. Nuclei are counterstained with Dapi (blue) (magnification x100).

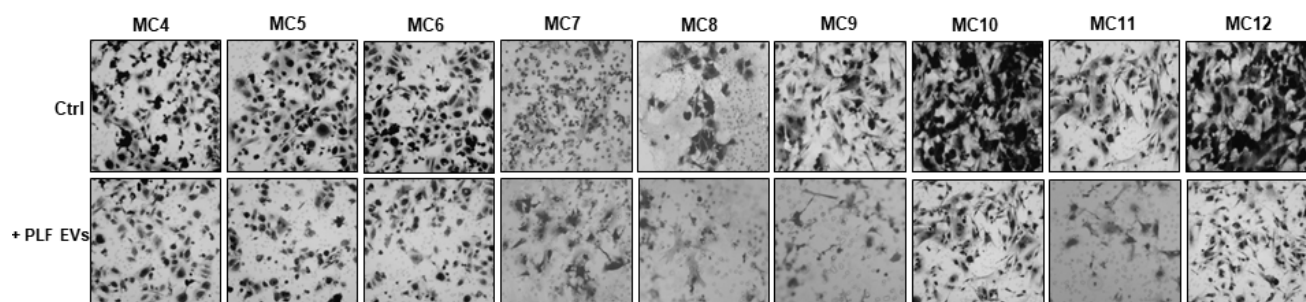

**Figure S8.** PLF EVs pool reduces mesothelial cells motility. Representative images of optical microscopy showing that PLF EVs pool isolated from the PLF of each patient reduces the motility of MC4-12 cell lines.

**Table S1.** Materials. Flow Cytometry (FCM), Immunohistochemistry (IHC), Immunofluorescence (IF), Western blot (WB).

| Product                                    | Catalog n.  | Company                                                                       | Assay   | Concentration of usage                   |
|--------------------------------------------|-------------|-------------------------------------------------------------------------------|---------|------------------------------------------|
| anti-CD9-Super Bright 436                  | 62-0098-42  | e-Biosciences, Thermo Fisher Scientific, Waltham, MA USA                      | FCM     | 5 $\mu$ L (0.25 $\mu$ g)/test            |
| anti-CD63-PE-Cyanine7                      | 25-0639-42  | e-Biosciences, Thermo Fisher Scientific, Waltham, MA USA                      | FCM     | 5 $\mu$ L (0.25 $\mu$ g)/test            |
| anti-CD81- PerCP-eFluor 710                | 44-0819-42  | e-Biosciences, Thermo Fisher Scientific, Waltham, MA USA                      | FCM     | 5 $\mu$ L (0.25 $\mu$ g)/test            |
| anti-CD44-VioBlue                          | 130-113-337 | Miltenyi Biotec, Bergisch Gladbach, Germany                                   | FCM     | 2 $\mu$ L /test                          |
| anti-CK-20-PE                              | ab209923    | Abcam, Cambridge, UK                                                          | FCM     | 1/500                                    |
| anti-a-SMA                                 | A5228       | Sigma-Aldrich, St. Louis, MO, USA                                             | IF      | 2 $\mu$ g /ml                            |
| anti-Vimentin                              | V6630       | Sigma-Aldrich, St. Louis, MO, USA                                             | IF      | 1:500                                    |
| anti-Lamp-1                                | #9091       | Cell Signaling Technology, Danvers, MA, USA                                   | IF      | 1:200                                    |
| anti- $\beta$ -Actin                       | #3700       | Cell Signaling Technology, Danvers, MA, USA                                   | WB      | 1:1000                                   |
| anti- $\alpha$ -Catenin                    | #8480       | Cell Signaling Technology, Danvers, MA, USA                                   | WB      | 1:1000                                   |
| anti- p-Smad2/3                            | #8828       | Cell Signaling Technology, Danvers, MA, USA                                   | WB      | 1:1000                                   |
| anti-CK-20                                 | MA5-31979   | Invitrogen, ThermoFisher Scientific, Waltham, MA USA                          | WB, IHC | 1:1000, 1:200                            |
| anti-Calretinin                            | PA5-16681   | Invitrogen, ThermoFisher Scientific, Waltham, MA USA                          | WB      | 1:500                                    |
| anti-uPAR (R-4)                            | MON-R-4-02  | Invitrogen, ThermoFisher Scientific, Waltham, MA USA                          | WB      | 1:500                                    |
| anti-CDX2                                  | PA0375      | Novocastra, Leica Biosystems, <u>Wetzlar, Germany</u>                         | IHC     | According the manufacturer instructions. |
| anti-Caspase 3                             | sc-7272     | Santa Cruz Biotechnology, Inc                                                 | WB      | 1:500                                    |
| Alexa Fluor™ 568 goat anti-mouse IgG       | A11004      | Molecular Probes, Life Technologies, ThermoFisher Scientific, Waltham, MA USA | IF      | 1:1000                                   |
| Alexa Fluor™ 488, Goat anti-Mouse IgG      | A11001      | Molecular Probes, Life Technologies, ThermoFisher Scientific, Waltham, MA USA | IF      | 1:1000                                   |
| Goat Anti-Mouse IgG (H + L)-HRP Conjugate  | #1706516    | BIORAD, <u>Hercules</u> , CA, USA                                             | WB      | 1:2000                                   |
| Goat Anti-Rabbit IgG (H + L)-HRP Conjugate | #1706515    | BIORAD, <u>Hercules</u> , CA, USA                                             | WB      | 1:2000                                   |
| <b>Other materials</b>                     |             |                                                                               |         |                                          |
| SB complete staining buffer                | SB-4401-42  | e-Biosciences, Thermo Fisher Scientific, Waltham, MA USA                      | FCS     | 2 $\mu$ L /test                          |
| Phalloidin-iFluor 555                      | ab176756    | Abcam, Cambridge, UK                                                          | IF      | 1:500                                    |

|                                                       |                  |                                                                               |                     |                                          |
|-------------------------------------------------------|------------------|-------------------------------------------------------------------------------|---------------------|------------------------------------------|
| DAPI (4',6-Diamidino-2-Phenylindole, Dihydrochloride) | D1306            | Invitrogen, ThermoFisher Scientific, Waltham, MA USA                          | IF                  | 300 nM                                   |
| Green Fluorescent Cell Linker                         | MIDI67-1KT       | Sigma-Aldrich St. Louis, MO, USA                                              | IF                  | According the manufacturer instructions. |
| FITC Annexin V Apoptosis Detection Kit I              | 556547           | BD Pharmingen™, San Jose, CA, USA                                             | FCM                 | According the manufacturer instructions. |
| Pantoprazolo                                          | AIC n. 044465019 | SUN Pharma, Sun Pharmaceutical Industries Ltd. <u>Goregaon, Mumbai, India</u> | Functional studies. | 1.25 and 2.5 µg/mL                       |

**Table S2.** Intensity ratio of Western Blot images showing in Figures 2c, 4d, 5c, and densitometry readings and showing in S1c.

| Fig. 2c |         | ✱-catenin normalized to ✱-actin |          |          |
|---------|---------|---------------------------------|----------|----------|
|         | Ctrl    | 1                               | 2        | 3        |
| CaCo-2  | 2758321 | 7242274                         | 8653667  | 16913705 |
| Colo205 | 1832862 | 12729893                        | 12410528 | 28636569 |
| PC1-V   | 3694842 | 6462198                         | 12200514 | 3502585  |

  

| Fig. 4d           |           | Caspase-3 normalized to stain free loading sample |           |           |
|-------------------|-----------|---------------------------------------------------|-----------|-----------|
|                   | 1         | 2                                                 | 3         | 4         |
| MC1               |           |                                                   |           |           |
| Pro-caspase 3     | 2746633,0 | 2873901,0                                         | 2671387,0 | 1406835,0 |
| Pro-caspase 3     | 2364687,0 | 1926893,0                                         | 1724544,0 | 1116577,0 |
| Pro-caspase 3     | 1746053,0 | 1497555,0                                         | 1945360,0 | 1482869,0 |
| Cleaved-caspase 3 | 0,0       | 1950548,0                                         | 1628676,0 | 1457912,0 |
| Cleaved-caspase 3 | 0,0       | 705569,0                                          | 670084,0  | 350212,0  |
| Cleaved-caspase 3 | 0,0       | 510012,0                                          | 860598,0  | 399062,0  |

  

| Fig. 5c |        | p-Smad 2/3 normalized to ✱-actin |         |        |
|---------|--------|----------------------------------|---------|--------|
|         | 1      | 2                                | 3       | 4      |
| MC1     | 650268 | 1010550                          | 1034423 | 601284 |

  

| Fig. S1c |  | Calretinin normalized to stain free loading sample |  |  |
|----------|--|----------------------------------------------------|--|--|
| MC1      |  | 29929760                                           |  |  |
| MC2      |  | 46105576                                           |  |  |
| MC3      |  | 30430095                                           |  |  |
| MC4      |  | 36015056                                           |  |  |
| MC5      |  | 23936169                                           |  |  |
| MC6      |  | 20235378                                           |  |  |
| MC7      |  | 62560320                                           |  |  |
| MC8      |  | 45822171                                           |  |  |
| MC9      |  | 36938573                                           |  |  |
| MC10     |  | 39728671                                           |  |  |
| MC11     |  | 35155302                                           |  |  |
| MC12     |  | 18000704                                           |  |  |



**Table S3.** Densitometry readings of the gelatine zymography bands showing in Figure S3.

|                | <b>Volume (Int)</b> |                |                |                |
|----------------|---------------------|----------------|----------------|----------------|
| <b>Fig. 1e</b> | <b>MC1</b>          | <b>MC2</b>     | <b>MC3</b>     |                |
| PRO-MMP9       | 19562810            | 29291036       | 24691106       |                |
| MMP9           | 16427924            | 24536384       | 18150410       |                |
| PRO-MMP2       | 177001112           | 155704902      | 158612306      |                |
| MMP2           | 118238424           | 101007572      | 86408920       |                |
| <b>Fig. 5c</b> | <b>MC1 - 1</b>      | <b>MC1 - 2</b> | <b>MC1 - 3</b> | <b>MC1 - 4</b> |
| MMP9           | 24391872            | 8686700        | 9257616        | 6643020        |
| PRO-MMP2       | 46332176            | 85406320       | 75051604       | 93743856       |
| MMP2           | 708335036           | 713850852      | 591925624      | 571421832      |
| <b>Fig. 5c</b> | <b>MC2 - 1</b>      | <b>MC2 - 2</b> | <b>MC2 - 3</b> | <b>MC2 - 4</b> |
| MMP9           | 22999633            | 55709908       | 76030263       | 35807966       |
| PRO-MMP2       | 18996963            | 46943491       | 48648793       | 61235576       |
| MMP2           | 403678870           | 621366515      | 742713670      | 787844249      |
| <b>Fig. 5c</b> | <b>MC3 - 1</b>      | <b>MC3 - 2</b> | <b>MC3 - 3</b> | <b>MC3 - 4</b> |
| PRO-MMP9       | 807618              | 2615412        | 1454637        | 3783423        |
| MMP9           | 25042791            | 22703754       | 35798502       | 79788759       |
| PRO-MMP2       | 19690563            | 49007016       | 76343619       | 70492308       |
| MMP2           | 241223718           | 579251850      | 701774817      | 737940345      |
| <b>Fig. 7f</b> | <b>MC1 - 1</b>      | <b>MC1 - 2</b> |                |                |
| MMP9           | 13349760            | 130981260      |                |                |
| PRO-MMP2       | 138386052           | 176989788      |                |                |
| MMP2           | 70971804            | 147619704      |                |                |
| <b>Fig. 7f</b> | <b>MC2 - 1</b>      | <b>MC2 - 2</b> | <b>MC3 - 1</b> | <b>MC3 - 2</b> |
| MMP9           | 74021850            | 150233370      | 49366590       | 52628520       |
| PRO-MMP2       | 269053260           | 303433830      | 270572610      | 294616350      |
| MMP2           | 199226790           | 218666910      | 188038200      | 199434270      |
